# Supplementary material
Source: Springer Nature journal article supplement (https://www.springermedizin.de/resource/supplementary/13024_2014_578_MOESM3_ESM.pdf/9644420)

**a**

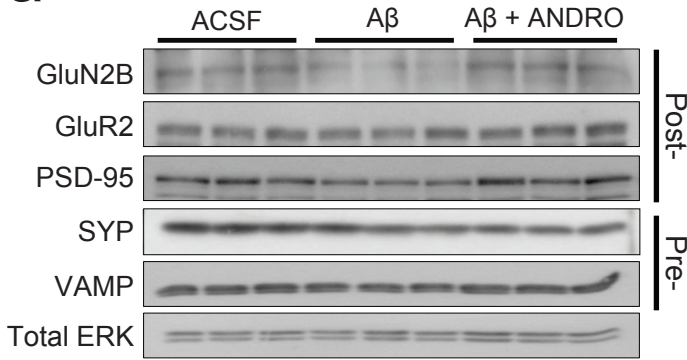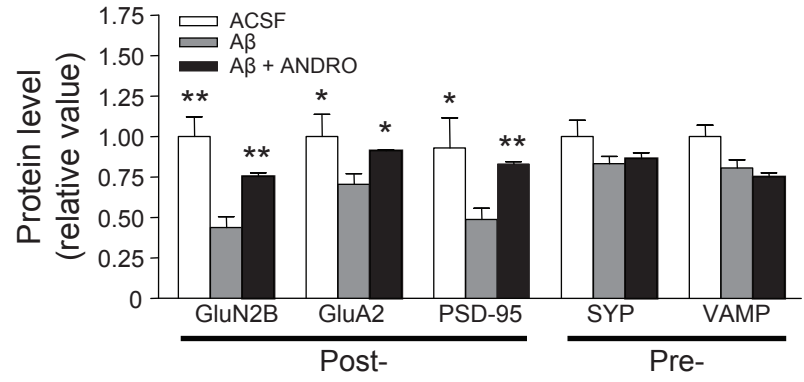

**b**

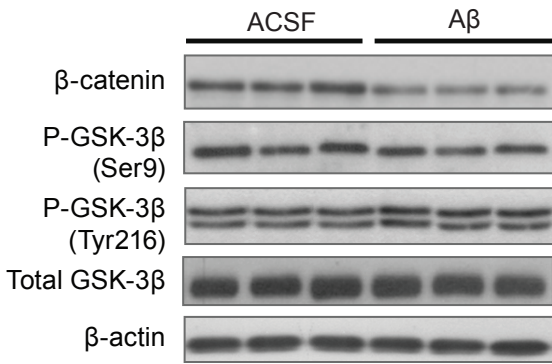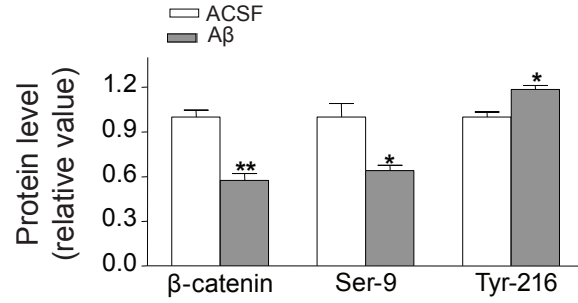

**c**

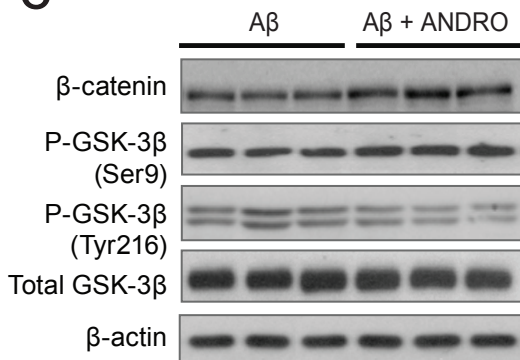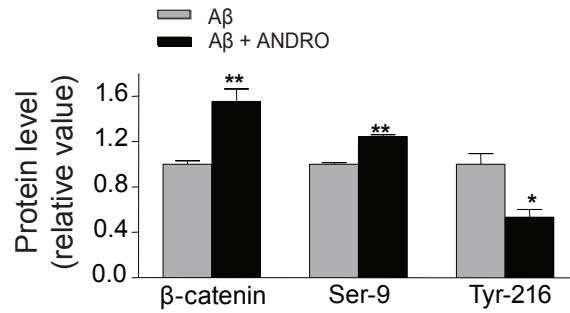

Supplement: MOESM3 [file 9644420]
